# Supplementary material
Source: Research Square preprint supplement (doi:10.21203/rs.3.rs-8643390/v1)
Supplement: Supplementary file 1 [file ff180ac6286de0aba5f23e3e.docx]

**Ethnopharmacological study of medicinal plants used in the management of dental carries**

**Questionnaire**

This questionnaire is conducted as part of a PhD thesis in Biochemistry/pharmacology at the Department of Biochemistry, Faculty of Sciences of the University of Dschang. We thank you in advance for your availability.

Survey number..........................................................................................................................................

**Part one : Dental caries patients (15 yrs and above)**

1. For how long have you been suffering from dental caries?.........................................................
2. Are there any other members of your family suffering from dental caries?
3. No.........................
4. Yes........................ how many?...................................
5. Others dental problems than dental caries: ……………………………………………............
6. Do you use medicinal plants to manage your dental caries?

Yes  No 

1. If yes, what is the main reason for the use of medicinal plants?................................................

....................................................................................................................................................

1. What type of plants do you use for the management of dental caries?

| Local Names | Names in English | Scientific Names | Part of the plant used | Modes of preparation | Modes of administration |
| --- | --- | --- | --- | --- | --- |
|  |  |  |  |  |  |
|  |  |  |  |  |  |

1. Are you satisfied with the treatment by plants?

Yes  No 

1. What do you think about plant-based treatment?.........................................................................

**Part two: Traditional medicine practitioners**

1. As a medicinal health practitioner, which plants do you administer to patients with dental caries?

| Local Names | Names in English | Scientific Names | Part of the plant used | Modes of preparation | Modes of administration |
| --- | --- | --- | --- | --- | --- |
|  |  |  |  |  |  |
|  |  |  |  |  |  |

1. What dose do you prescribe? ......................................................................................................
2. Are you satisfied with the treatment by plants?

Yes  No 

1. What do you think about plant-based treatment?.........................................................................

.......................................................................................................................................................

The end!
